# Supplementary material for: An efficient two-photon fluorescent probe for measuring γ-glutamyltranspeptidase activity during the oxidative stress process in tumor cells and tissues
Source: Royal Society of Chemistry journal article supplement (doi:10.1039/c7an00229g), 2017-01-01
Supplement: c7an00229g1.pdf [file c7an00229g1.pdf]

***Supporting Information for***

**Efficient two-photon fluorescent probe for measuring  $\gamma$ -glutamyltranspeptidase activity during oxidative stress process in tumor cells and tissues**

Peng Wang,<sup>1</sup> Jing Zhang,<sup>1</sup> Hong-Wen Liu,<sup>1</sup> Xiao-Xiao Hu,<sup>1</sup> Lili Feng,<sup>1, 2</sup> Xia Yin<sup>1, \*</sup>  
and Xiao-Bing Zhang<sup>1, \*</sup>

<sup>1</sup> *Molecular Science and Biomedicine Laboratory, State Key Laboratory of Chemo/Biosensing and Chemometrics, College of Chemistry and Chemical Engineering, Collaborative Innovation Center for Chemistry and Molecular Medicine, Hunan University, Changsha, Hunan 410082, China*

<sup>2</sup> *The Key Laboratory of Life-Organic Analysis, College of Chemistry and Chemical Engineering, Qufu Normal University, Qufu Shandong 273165, PR China*

\* To whom correspondence should be addressed.

E-mail: [xbzhang@hnu.edu.cn](mailto:xbzhang@hnu.edu.cn), [yinxia@hnu.edu.cn](mailto:yinxia@hnu.edu.cn) Tel: +86-731-88821894

**Table S1.** Determination of GGT Level in Tissue Samples.

| Sample              | GGT Level/ U L <sup>-1</sup> |
|---------------------|------------------------------|
| normal liver tissue | 7.36 ± 4.18                  |
| liver cancer tissue | 83.56 ± 25.56                |

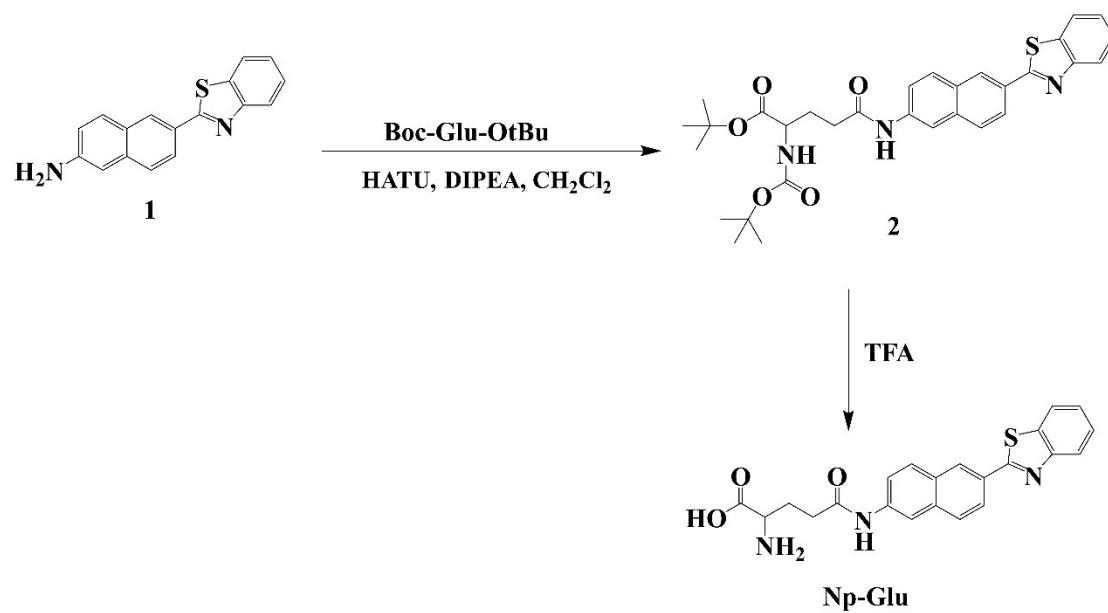

**Fig. S1.** Synthesis route of probe **Np-Glu**.

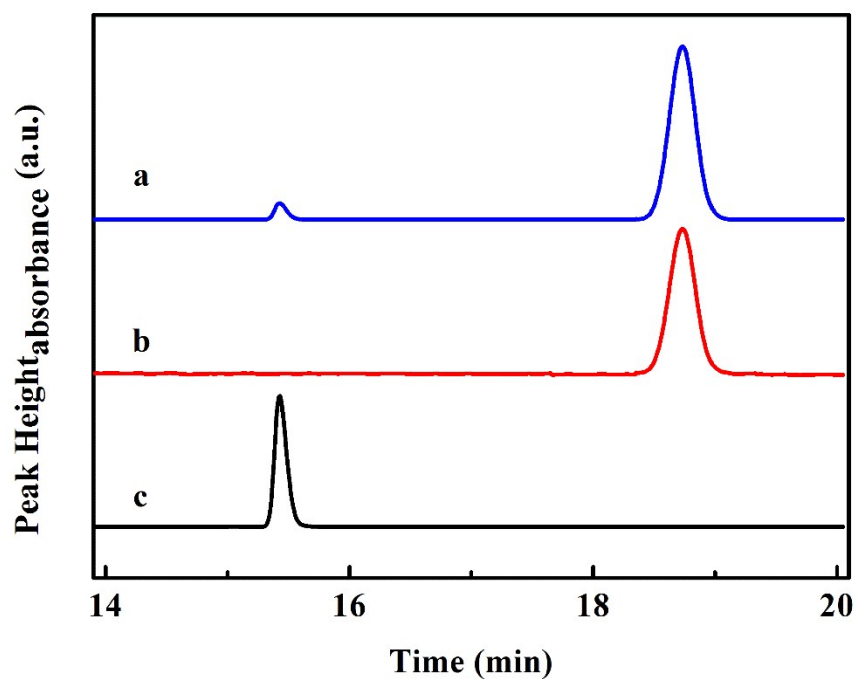

**Fig. S2.** Chromatograms of different reaction systems. (a) the reaction solution of 10  $\mu\text{M}$  **Np-Glu** with 100  $\text{U L}^{-1}$  GGT; (b) 10  $\mu\text{M}$  compound **1**; (c) 10  $\mu\text{M}$  **Np-Glu**. Detection: UV-vis (325 nm) detector. Flow rate: 3 mL/min. T: 25  $^{\circ}\text{C}$ . Injection volume: 100  $\mu\text{L}$ . Mobile phase: water-acetonitrile, 70:30 (v/v) to 30:70 for 30 min.

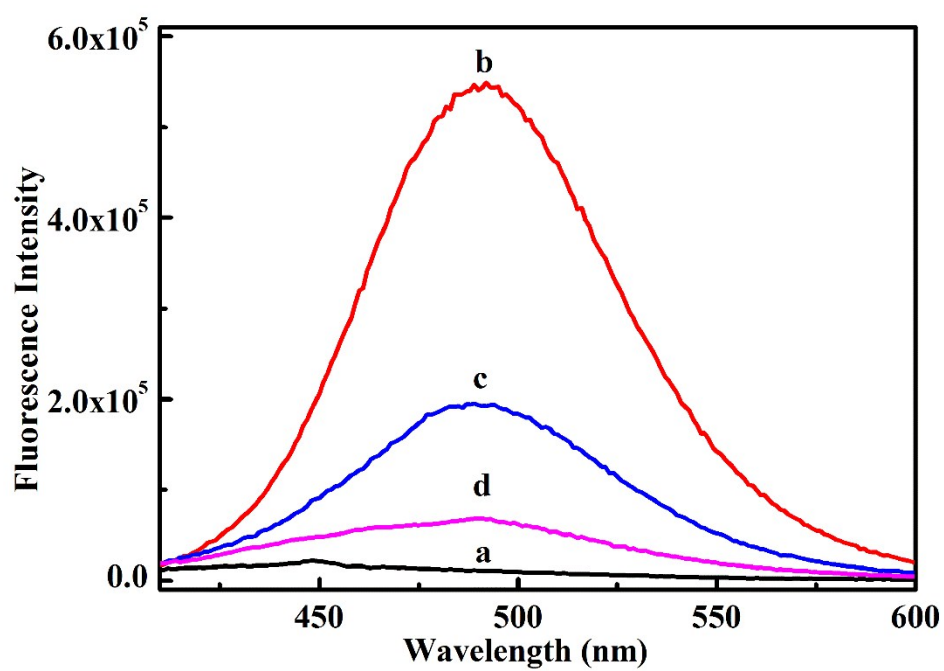

**Fig. S3.** Fluorescence emission spectra of different reaction systems. (a) **Np-Glu** ( $10\mu\text{M}$ ) in PBS buffer (control); (b) system (a) + GGT ( $20\text{ U L}^{-1}$ ); (c) system (b) + DON ( $1\text{ mM}$ ); (d) system (b) + DON ( $3\text{ mM}$ ).  $\lambda_{\text{ex}} = 390\text{ nm}$ .

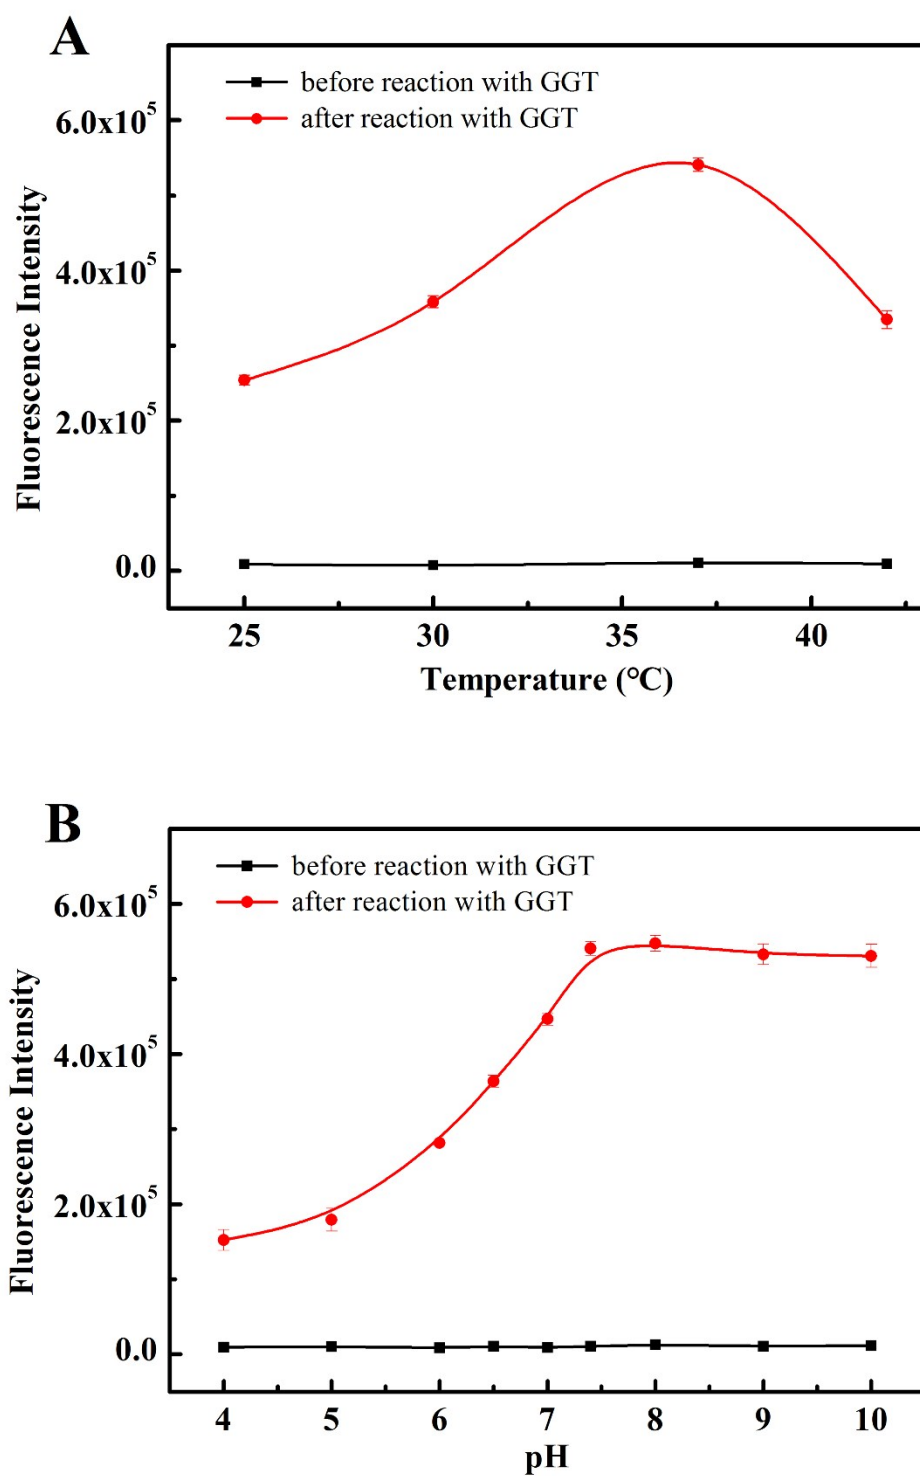

**Fig. S4.** Effects of (A) temperature and (B) pH on the fluorescence ( $\lambda_{\text{ex/em}} = 390/490$  nm) of **Np-Glu** (10  $\mu\text{M}$ ) reacting with GGT (20 U L<sup>-1</sup>). The results are the mean standard deviation of three separate measurements.

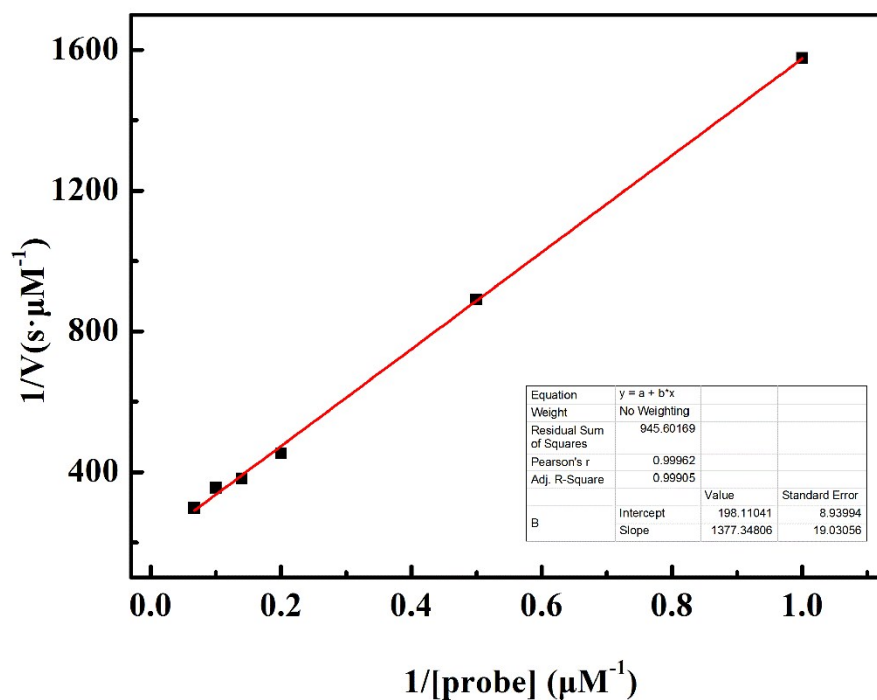

**Fig. S5.** Lineweaver-Burk plot for the enzyme-catalyzed reaction. The Michaelis-Menten equation was described as:  $V = V_{\max} [\text{probe}] / (K_m + [\text{probe}])$ , where  $V$  is the reaction rate,  $[\text{probe}]$  is the probe concentration (substrate), and  $K_m$  is the Michaelis constant. Conditions 20 U L<sup>-1</sup> GGT, 1, 2, 5, 7, 10, and 15  $\mu\text{M}$  of **Np-Glu**,  $\lambda_{\text{ex/em}} = 390/490$  nm. Points were fitted using a linear regression model (correlation coefficient  $R = 0.999$ ).

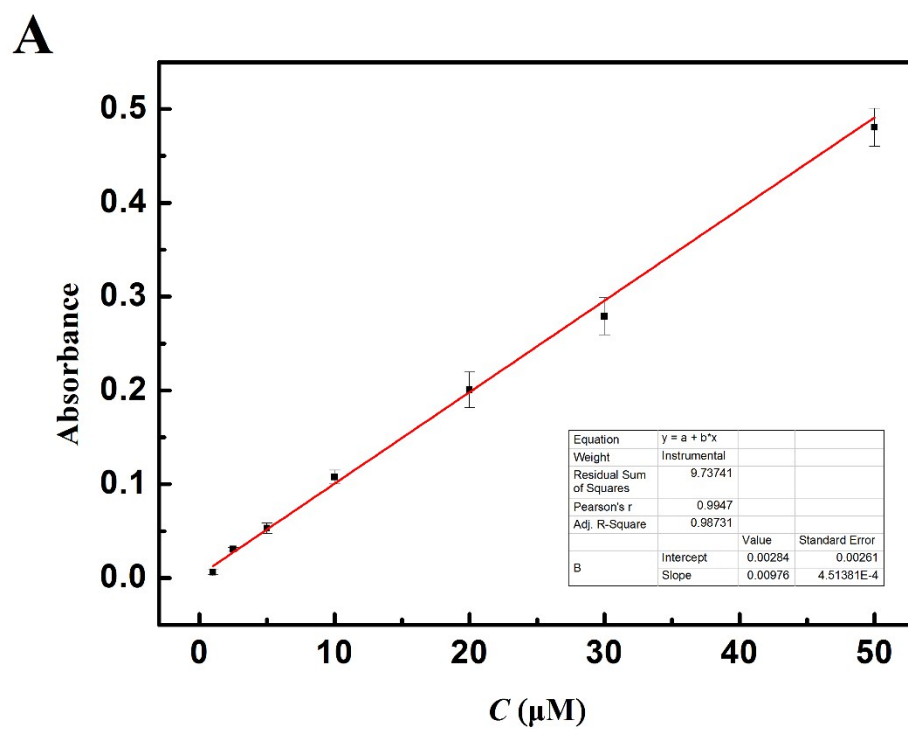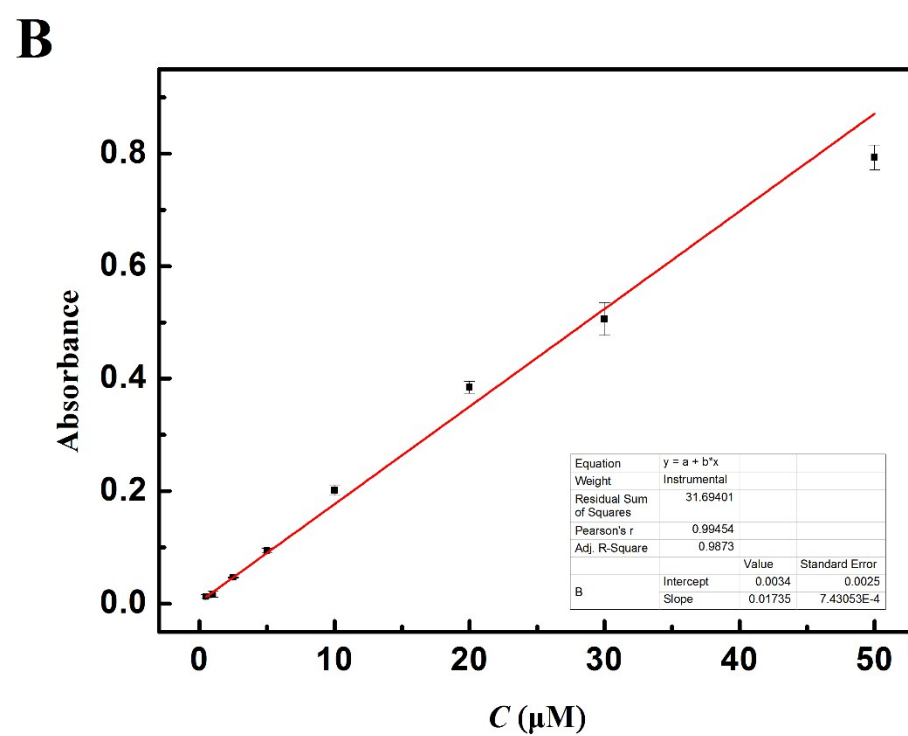

**Fig. S6.** The solubility data of **Np-Glu** (A) and compound **1** (B) in buffer solution used for cell incubation.

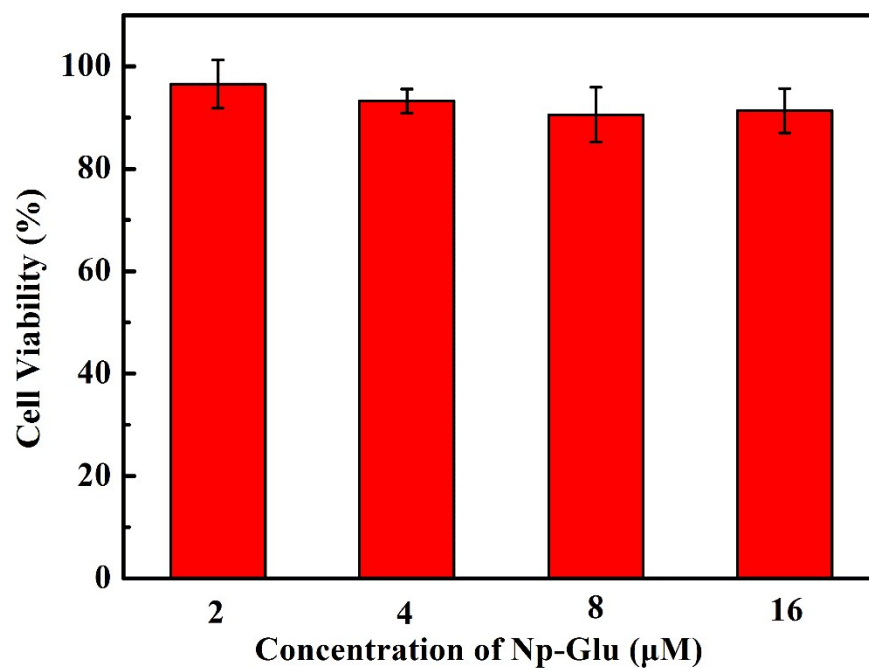

**Fig. S7.** Effects of **Np-Glu** with varied concentrations (2, 4, 8, 16  $\mu\text{M}$ ) on the viability of HepG2 cells. The viability of the cells without **Np-Glu** is defined as 100%. The results are the mean  $\pm$  standard deviation of five separate measurements.



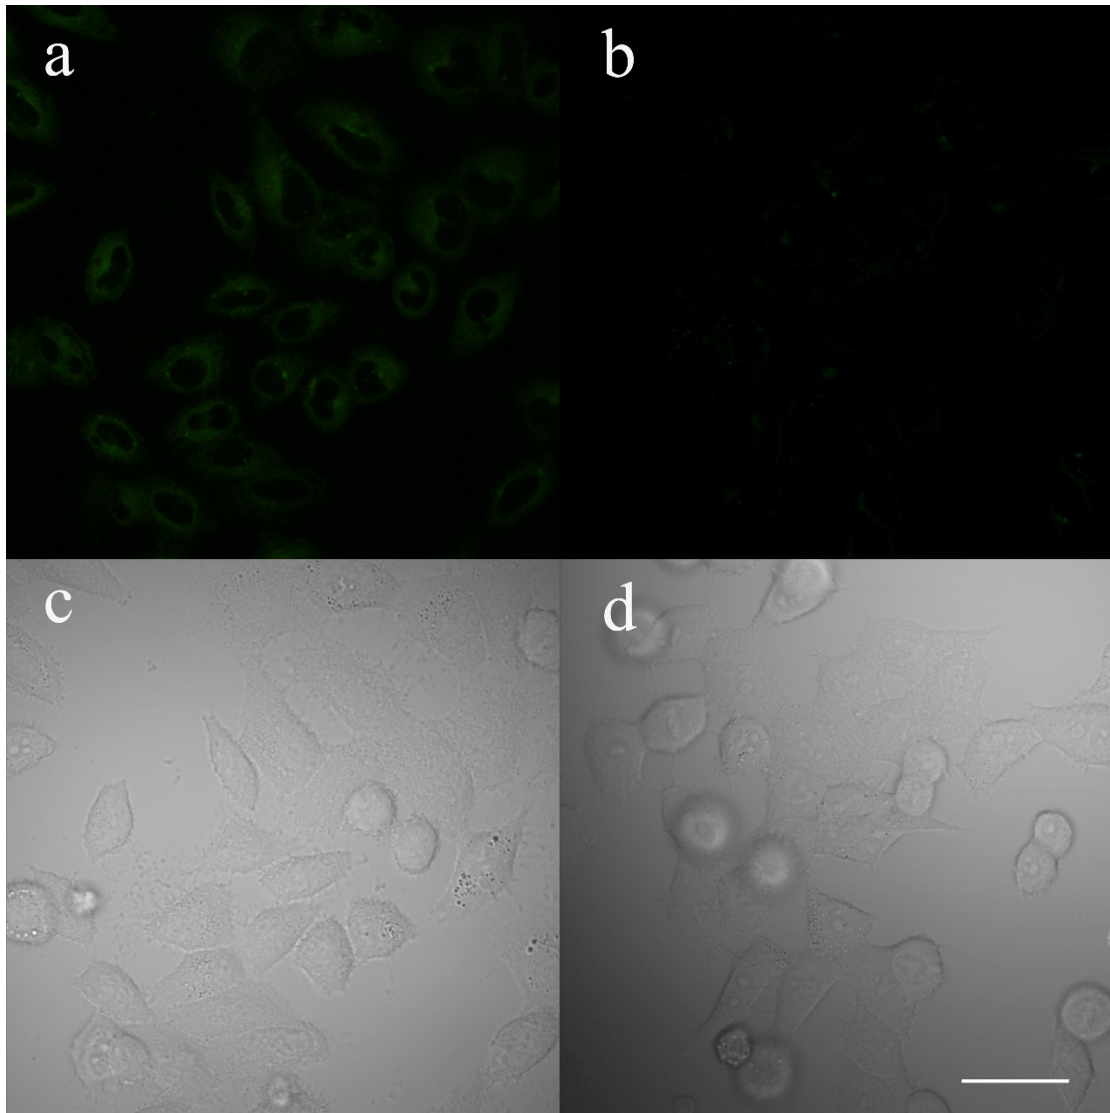

**Fig. S8.** TP fluorescence images (a) and DIC images (c) of HepG2 cells incubated with 5  $\mu$ M **Np-Glu**. TP fluorescence images (b) and DIC images (d) of HepG2 cells incubated with 5  $\mu$ M **Np-Glu** and 3 mM DON. Scale bar: 40  $\mu$ m

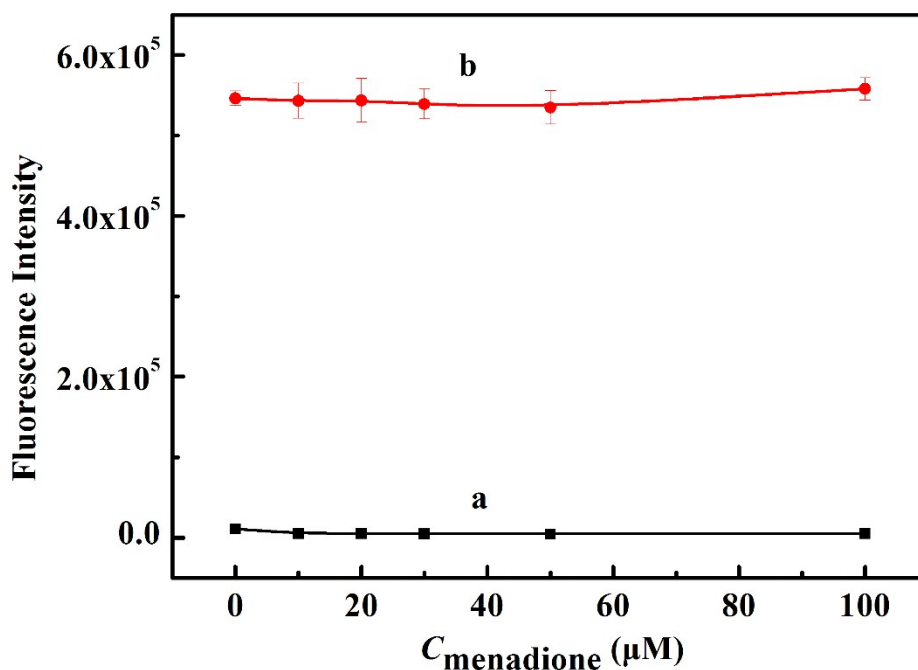

**Fig. S9.** Effects of menadione at varied concentrations (0, 10, 20, 30, 50 and 100  $\mu\text{M}$ , respectively) on the fluorescence ( $\lambda_{\text{ex/em}} = 390/490 \text{ nm}$ ) of **Np-Glu** with and without GGT. (a) menadione at varied concentrations was mixed with **Np-Glu** (10  $\mu\text{M}$ ) at 37  $^{\circ}\text{C}$  for 45 min. (b) GGT (20 U L $^{-1}$ ) was pretreated with menadione at varied concentrations for 6 h at 37  $^{\circ}\text{C}$ , and then incubated with **Np-Glu** (10  $\mu\text{M}$ ) for 45 min. The results are the mean  $\pm$  standard deviation of three separate measurements.

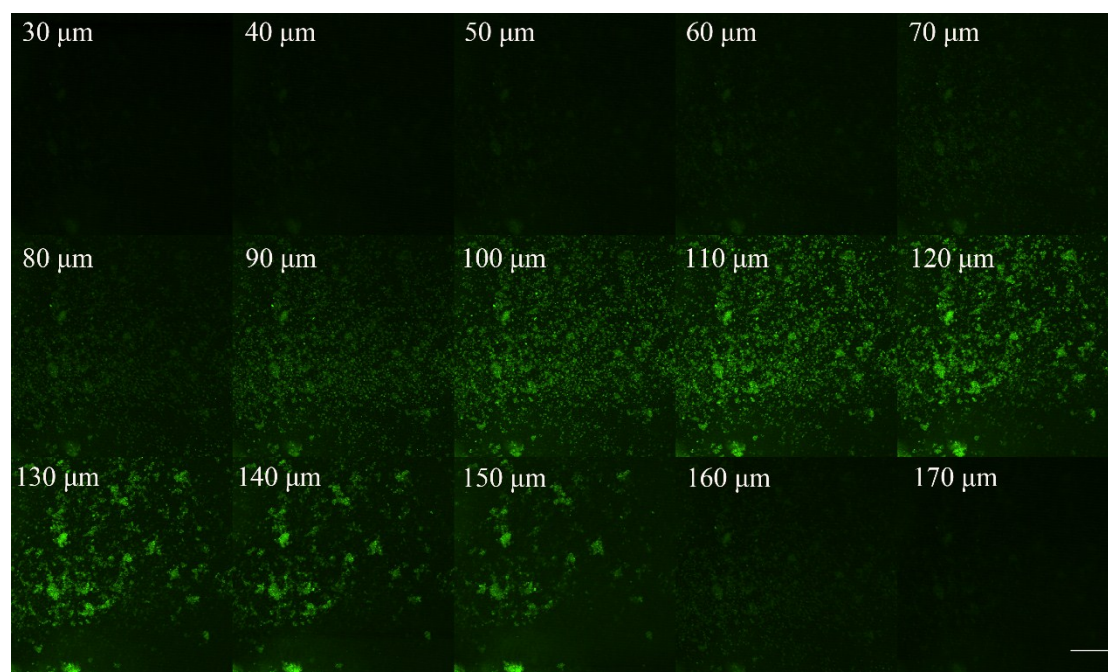

**Fig. S10.** Depth of TP fluorescence images of **Np-Glu** (5  $\mu\text{M}$ ) in tissues. Scale bar: 200  $\mu\text{m}$ .

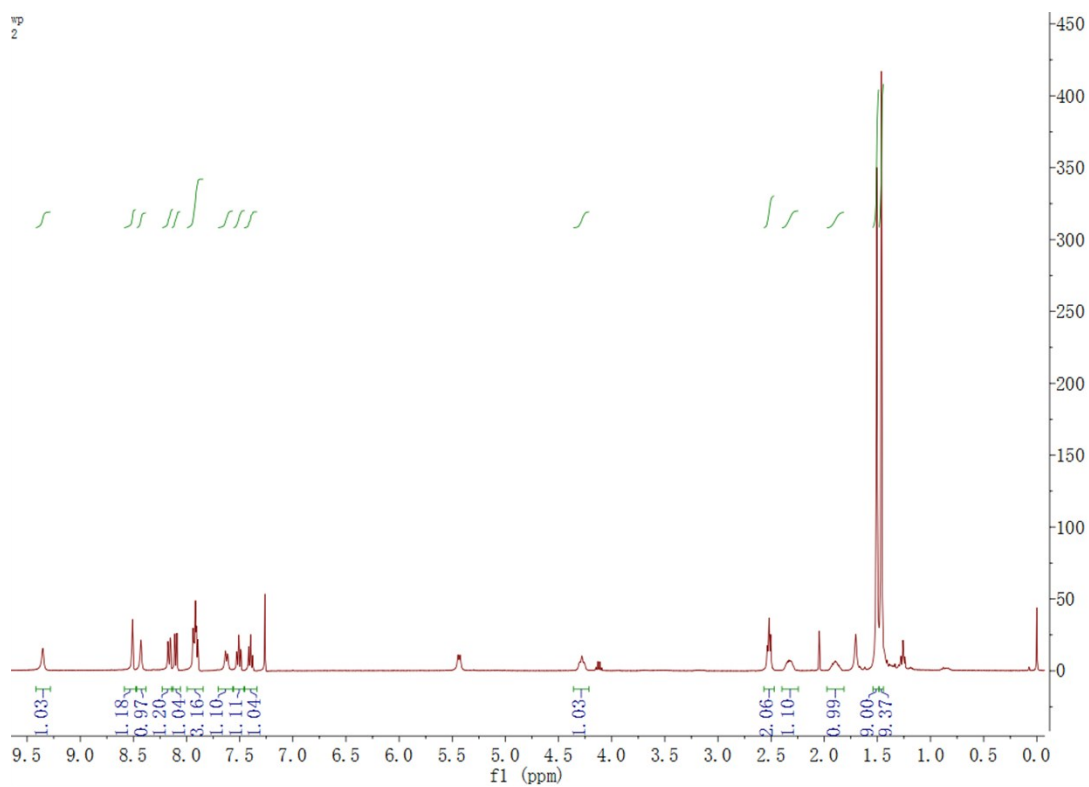

**Fig. S11.**  $^1\text{H}$  NMR spectrum of the compound **2**.

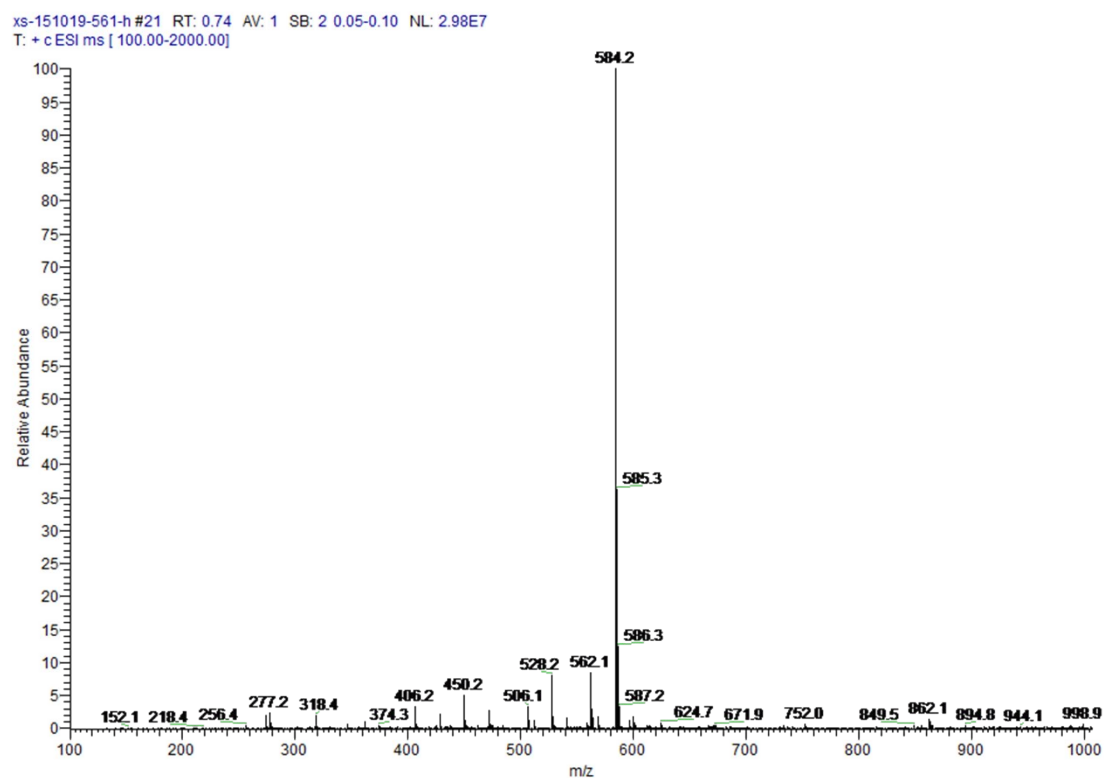

**Fig. S12.** ESI-MS spectrum of the compound **2**.

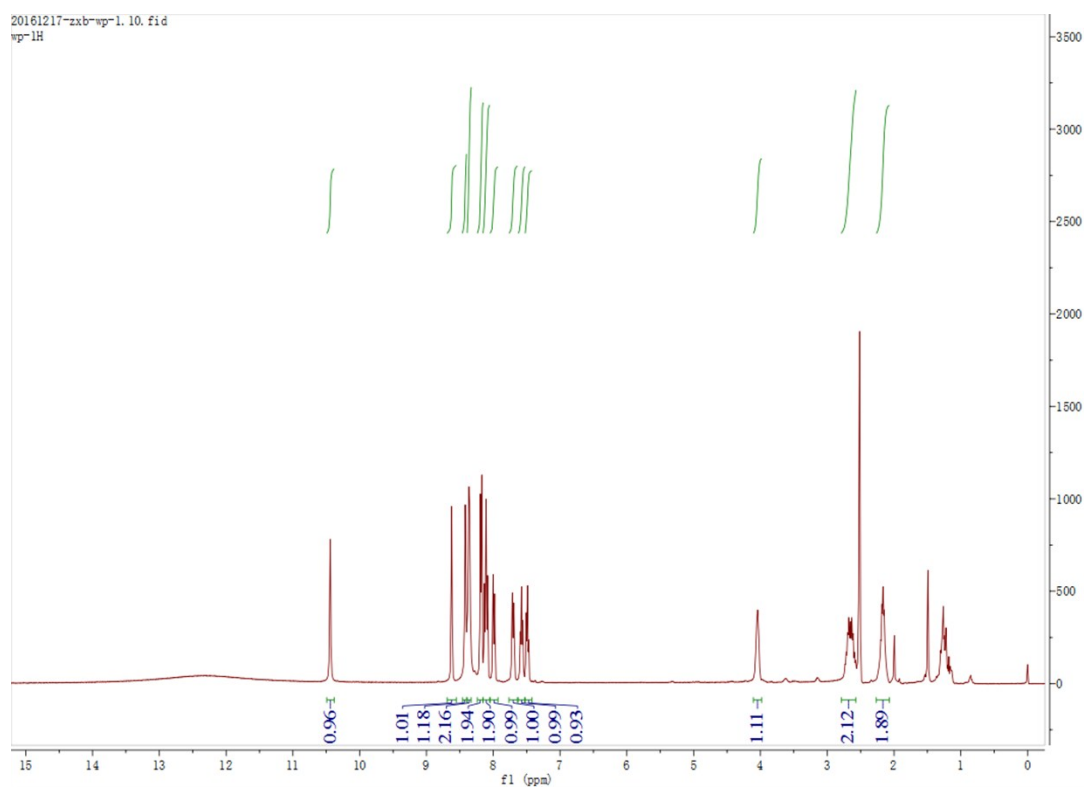

**Fig. S13.**  $^1\text{H}$  NMR spectrum of **Np-Glu**.

wp-151021-405-2 #30 RT: 0.69 AV: 1 SB: 5 0.32-0.41 NL: 2.03E5  
T: - c ESI ms [50.00-1500.00]

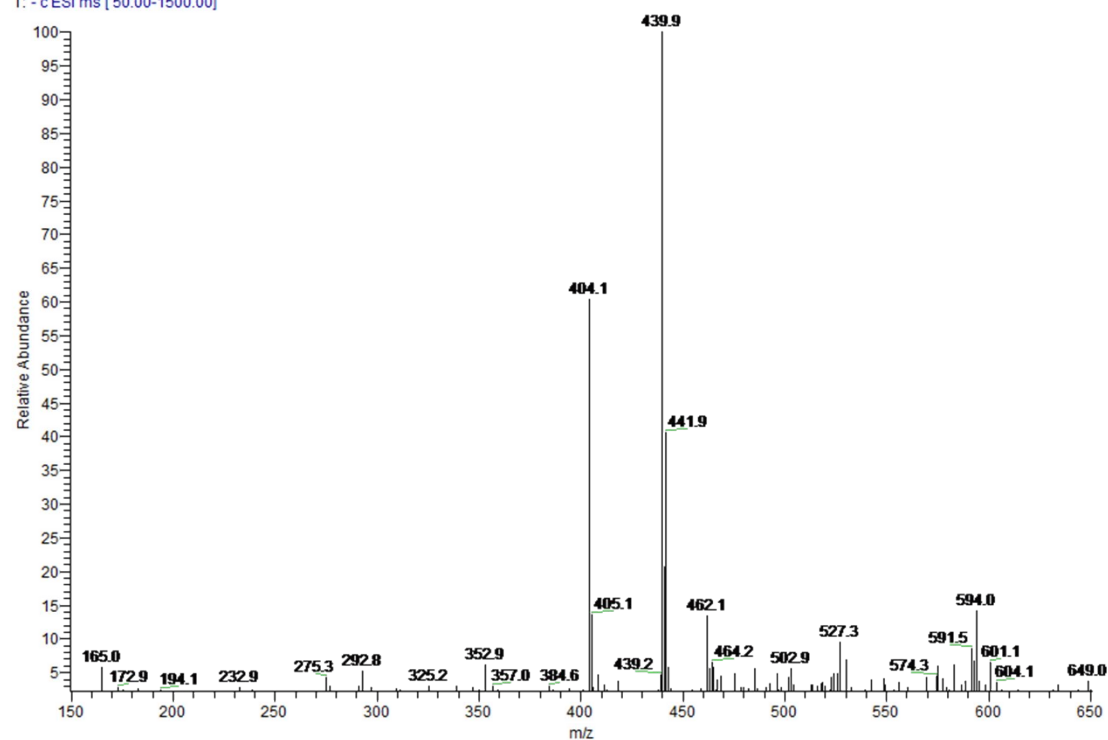

**Fig. S14.** ESI-MS spectrum of Np-Glu.

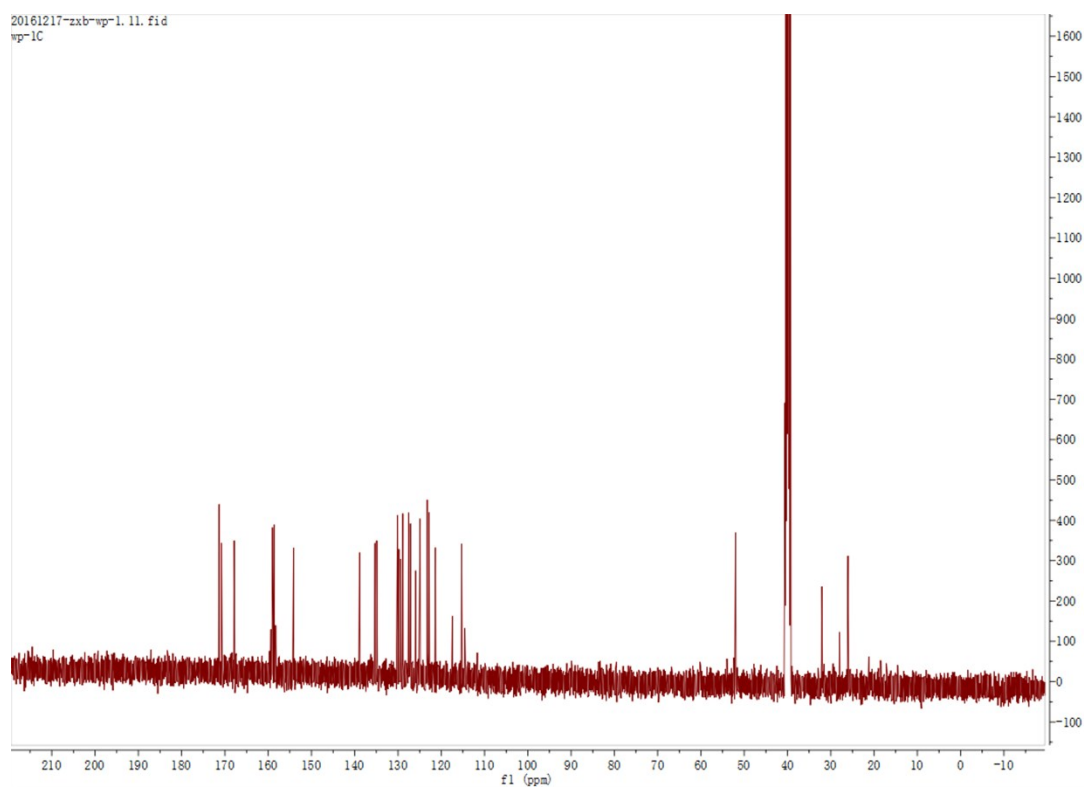

**Fig. S15.** <sup>13</sup>C NMR spectrum of Np-Glu.
